# Supplementary material for: Surgical site infection after hip fracture – mortality and risk factors: an observational cohort study of 1,709 patients
Source: PubMed Central journal article supplement (PMC8023915; doi:10.1080/17453674.2020.1717841), 2020-01-24
Supplement: IORT_A_1717841_SM7507.pdf [file IORT_A_1717841_SM7507.pdf]

## Supplementary data

Table 2. Surgical treatment. Values are n (%) unless otherwise specified

| Factor                           | Entire cohort<br>(n = 1,709) | Survivors<br>at 90 days<br>(n = 1,459) | Deceased<br>at 90 days<br>(n = 250) | No SSI<br>(n = 1,664) | SSI<br>(n = 45) |
|----------------------------------|------------------------------|----------------------------------------|-------------------------------------|-----------------------|-----------------|
| Hours from fracture to surgery   |                              |                                        |                                     |                       |                 |
| 0–6                              | 11 (0.6)                     | 9 (0.6)                                | 2 (0.8)                             | 11 (0.7)              | –               |
| >6–12                            | 115 (6.7)                    | 105 (7.2)                              | 10 (4.0)                            | 113 (6.8)             | 2 (4.4)         |
| >12–24                           | 514 (30)                     | 449 (31)                               | 65 (26)                             | 504 (30)              | 10 (22)         |
| >24–48                           | 698 (41)                     | 590 (40)                               | 108 (43)                            | 678 (41)              | 20 (44)         |
| >48                              | 302 (18)                     | 248 (17)                               | 54 (22)                             | 290 (17)              | 12 (27)         |
| Not reported                     | 69 (4.0)                     | 58 (4.0)                               | 11 (4.4)                            | 68 (4.1)              | 1 (2.2)         |
| Type of anesthesia               |                              |                                        |                                     |                       |                 |
| Spinal                           | 1,476 (86)                   | 1,258 (86)                             | 218 (87)                            | 1,435 (86)            | 41 (91)         |
| General                          | 152 (8.9)                    | 131 (9.0)                              | 21 (8.4)                            | 149 (9.0)             | 3 (6.7)         |
| Other                            | 59 (3.5)                     | 51 (3.5)                               | 8 (3.2)                             | 58 (3.5)              | 1 (2.2)         |
| Not reported                     | 22 (1.3)                     | 19 (1.3)                               | 3 (1.2)                             | 22 (1.3)              | –               |
| Type of procedure                |                              |                                        |                                     |                       |                 |
| Hemiarthroplasty                 | 884 (52)                     | 753 (52)                               | 131 (52)                            | 856 (51)              | 28 (62)         |
| Sliding hip screw                | 825 (48)                     | 706 (48)                               | 119 (48)                            | 808 (49)              | 17 (38)         |
| Surgeon's experience             |                              |                                        |                                     |                       |                 |
| ≤ 3 years                        | 209 (12)                     | 176 (12)                               | 33 (13)                             | 203 (12)              | 6 (13)          |
| > 3 years                        | 1427 (84)                    | 1219 (84)                              | 208 (83)                            | 1,388 (83)            | 39 (87)         |
| Not reported                     | 73 (4.3)                     | 64 (4.4)                               | 9 (3.6)                             | 73 (4.4)              | –               |
| Intraoperative complication      |                              |                                        |                                     |                       |                 |
| No                               | 1,524 (89)                   | 1,305 (89)                             | 219 (88)                            | 1,487 (89)            | 37 (82)         |
| Yes                              | 126 (7.4)                    | 103 (7.1)                              | 23 (9.2)                            | 119 (7.2)             | 7 (16)          |
| Not reported                     | 59 (3.5)                     | 51 (3.5)                               | 8 (3.2)                             | 58 (3.5)              | 1 (2.2)         |
| Duration of surgery <sup>a</sup> |                              |                                        |                                     |                       |                 |
| median                           | 64                           | 65                                     | 60                                  | 64                    | 65              |
| range                            | 16–241                       | 16–241                                 | 19–144                              | 16–209                | 30–241          |

Percentages are column percentages; SSI: early (sliding hip screws) and early and delayed (hemiarthroplasties) deep surgical site infection;  
<sup>a</sup> Time from incision to skin closure in minutes.

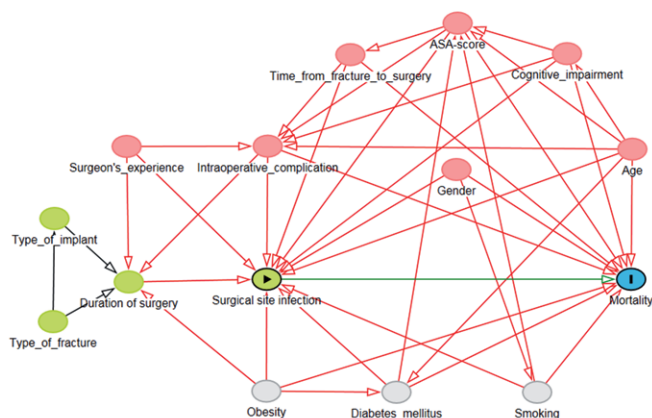

Figure 3a. Directed acyclic graph depicting a causal model for the association between early deep surgical site infection and mortality. ● exposure; ● outcome; ● ancestor of exposure; ● ancestor of exposure and outcome (confounder); ● unobserved; — causal path; — biasing path.

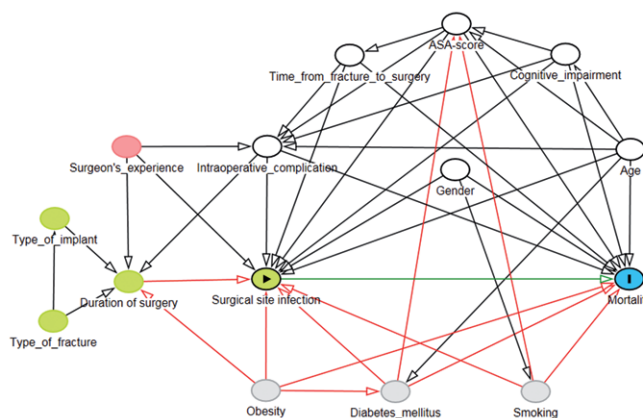

Figure 3b. Directed acyclic graph depicting the adjustment for observed confounding of the association between early deep surgical site infection and mortality. For symbols, see Figure 3a and ○ adjusted variable.

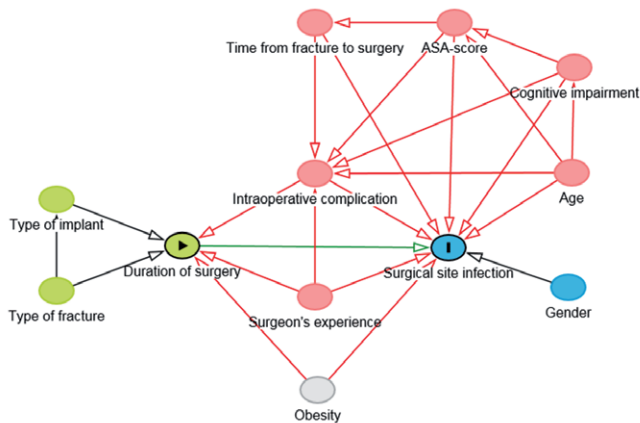

Figure 4a. Directed acyclic graph depicting a causal model for the association between duration of surgery and early and delayed deep surgical site infection. ● exposure; ● outcome; ● ancestor of exposure; ● ancestor of outcome; ● ancestor of exposure and outcome (confounder); ● unobserved; — causal path; — biasing path.

Table 5. Univariable binary logistic regression analysis of risk factors for early and delayed deep surgical site infection

| Factor                      | Early and delayed deep SSI <sup>a</sup> |         | Missing (%) |
|-----------------------------|-----------------------------------------|---------|-------------|
|                             | Odds ratio (CI)                         | p-value |             |
| Cognitive impairment        |                                         | 0.05    | 2.6         |
| uncertain                   | 2.6 (1.2–5.8)                           | 0.02    |             |
| yes                         | 1.6 (0.8–3.4)                           | 0.2     |             |
| Intraoperative complication | 2.4 (1.03–5.4)                          | 0.04    | 3.5         |
| Duration of surgery (hours) | 1.9 (1.1–3.5)                           | 0.04    | –           |
| ASA score ≥ 3               | 2.2 (0.98–5.0)                          | 0.06    | 2.1         |

<sup>a</sup> Early (sliding hip screws) and early and delayed (hemiarthroplasties) deep surgical site infection. ASA: American Society of Anesthesiologists.

Table 6. Multivariable binary logistic regression analysis of the association between duration of surgery and early and delayed deep surgical site infection

| Factor                            | Early and delayed deep SSI <sup>a</sup> |         |
|-----------------------------------|-----------------------------------------|---------|
|                                   | Odds ratio (CI)                         | p-value |
| Duration of surgery (hours)       | 1.5 (0.8–2.9)                           | 0.2     |
| Intraoperative complication       | 2.1 (0.9–4.9)                           | 0.1     |
| Surgeon's experience <sup>b</sup> | 0.9 (0.4–2.2)                           | 0.9     |

<sup>a</sup> Early (sliding hip screws) and early and delayed (hemiarthroplasties) deep surgical site infection.

<sup>b</sup> At least 1 surgeon with more than 3 years of experience in hip fracture surgery; 7.1% missing.
